# Supplementary material
Source: publisher figshare collection journal article supplement (https://sage.figshare.com/ndownloader/files/14241176)
Supplement: Supplementary file 1 [file 14241176]

# Seeing a drummer's performance modulates the subjective experience of groove while listening to popular music drum patterns

Eaves, D. L., Griffiths, N., Burridge, E., McBain, T., & Butcher, N.,

*Musicae Scientiae.*

## Supplementary Material

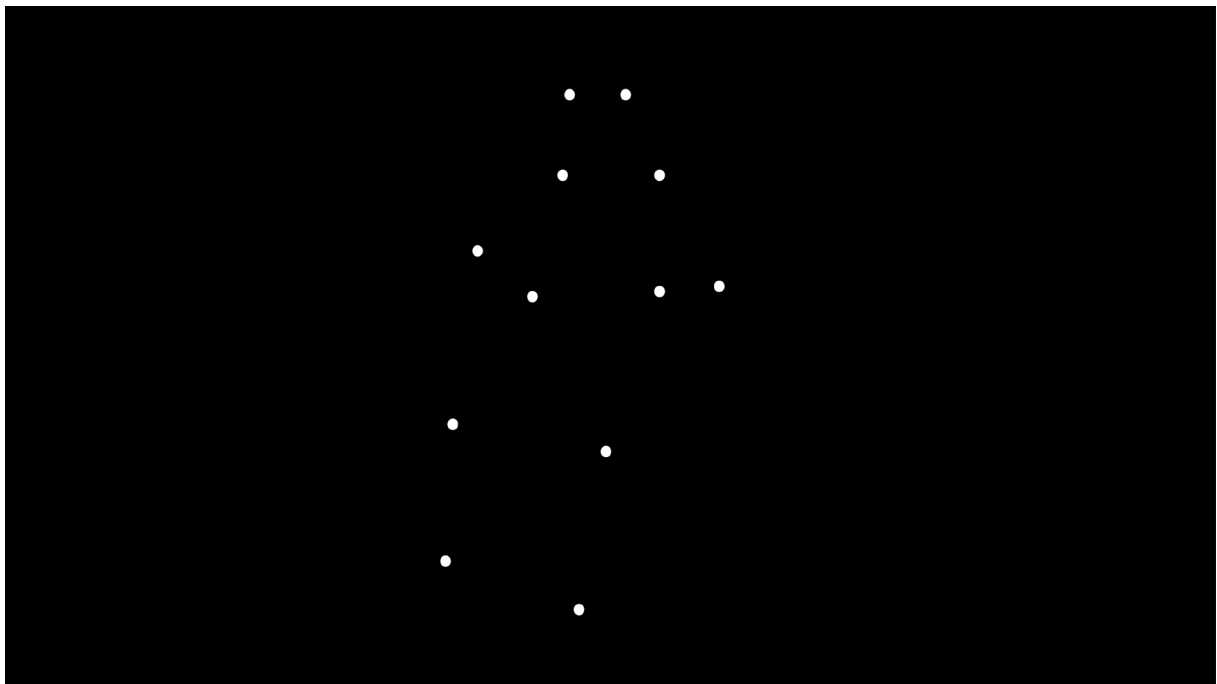

**Figure S1.** Screen shot of the drummer's point-light display. Reflective markers were fitted to both sides of the drummer's body, on his ankles, knees, shoulders, elbows, wrists and temples on the head. These were detected using motion-sensitive cameras and displayed as white points of light against a black background.
